# Supplementary material for: Mechanical Stress Induces Remodeling of Vascular Networks in Growing Leaves
Source: PLOS journal article supplement (doi:10.1371/journal.pcbi.1004819), 2016-04-13
Supplement: S7 (10.1371/journal.pcbi.1004819.s007) [file journal.pcbi.1004819.s007]

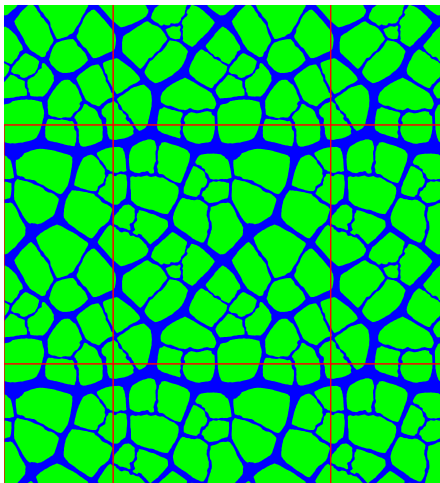

End of vein creation stage.

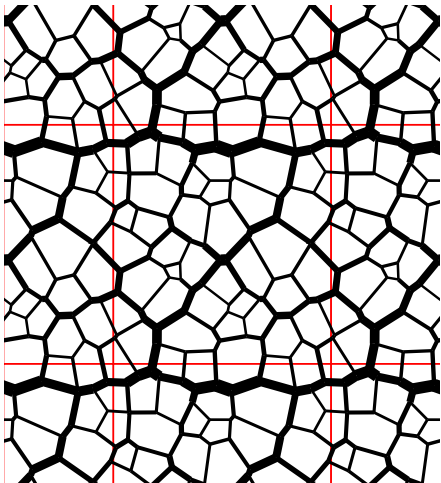

Beginning of vein reorganization stage.
